# Supplementary material for: Cloud vertical structure over a tropical station obtained using long-termhigh resolution Radiosonde measurements
Source: Copernicus journal article supplement (doi:10.5194/acp-2018-194), 2018-04-05
Supplement: Supplementary file 1 [file acp-2018-194-supplement.pdf]

**Supplementary Figures**

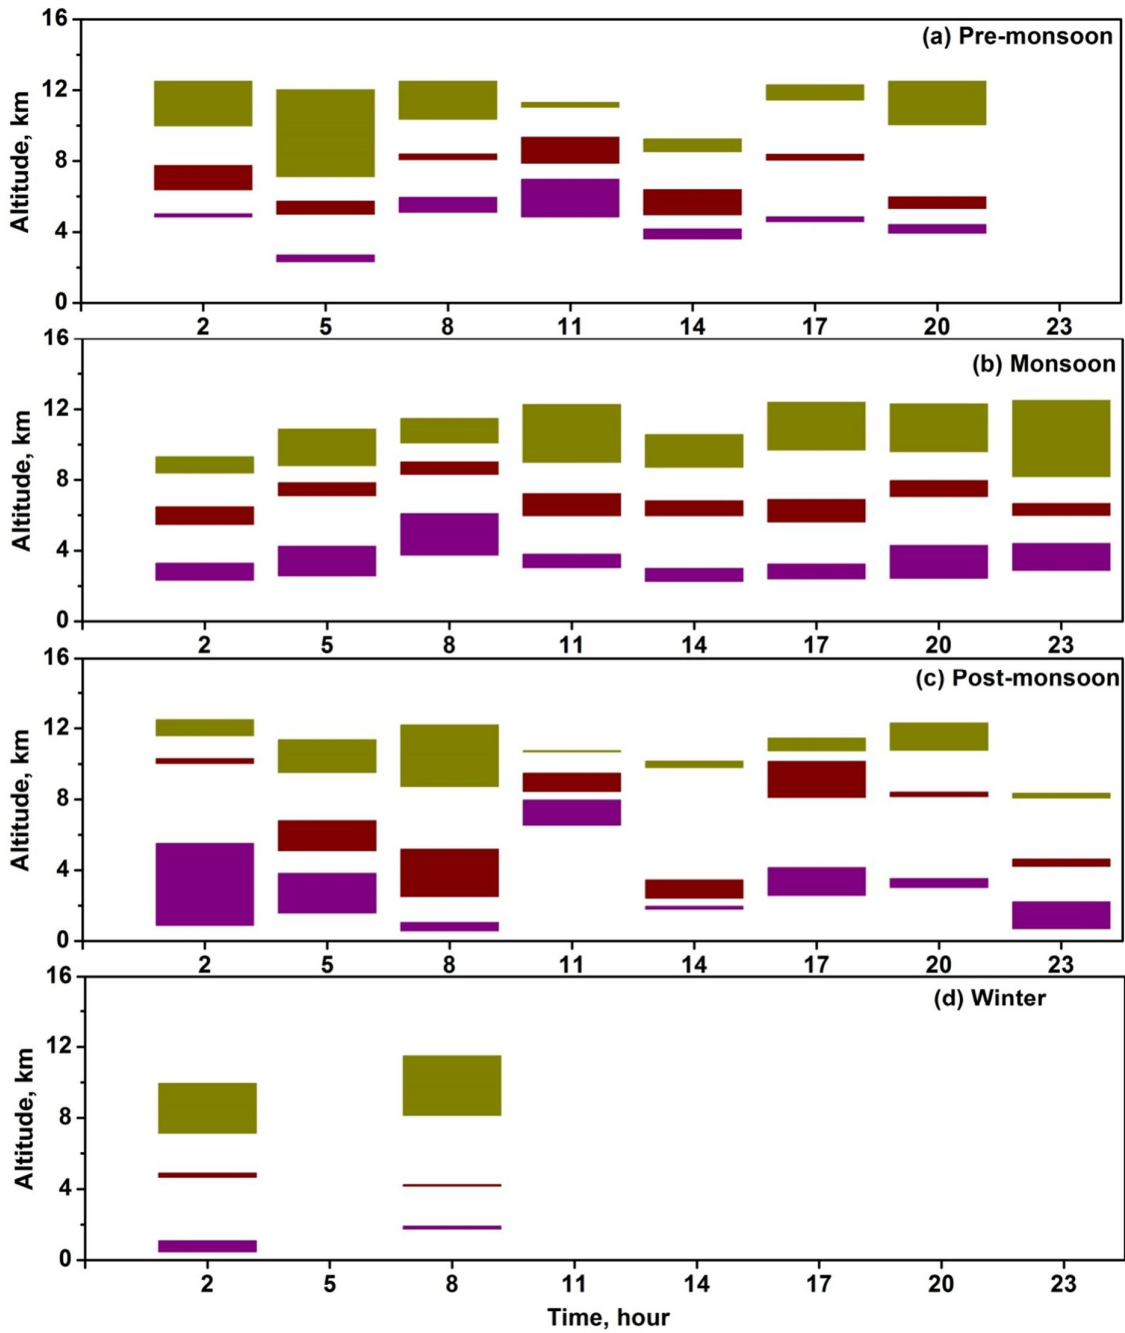

**Figure S1.** Diurnal variations of mean vertical locations (base and top), thicknesses of three-layer clouds observed during (a) pre-monsoon, (b) monsoon, (c) post-monsoon, and (d) winter seasons.

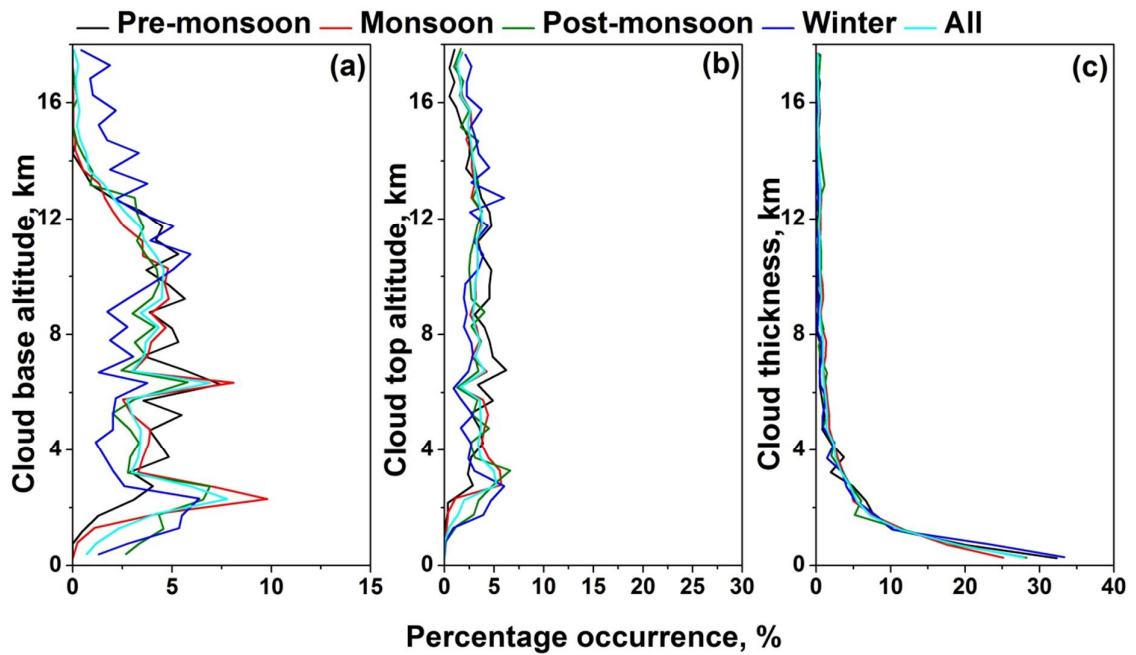

Figure S2. Percentage occurrence of the (a) cloud base altitude, (b) cloud top altitude and (c) cloud thickness observed during different seasons over Gadanki. Altitude bin size is 500 m.
